# Supplementary material for: Impact of a vegan diet on the human salivary microbiota
Source: PubMed Central journal article supplement (PMC5895596; doi:10.1038/s41598-018-24207-3), 2018-04-11
Supplement: 41598_2018_24207_MOESM1_ESM.pdf [file 41598_2018_24207_MOESM1_ESM.pdf]

# SUPPLEMENTARY TABLES AND FIGURES

## IMPACT OF A VEGAN DIET ON THE HUMAN SALIVARY MICROBIOTA

Tue H. Hansen<sup>1</sup>, Timo Kern<sup>1</sup>, Emilie G. Bak<sup>1</sup>, Alireza Kashani<sup>1</sup>, Kristine H. Allin<sup>1</sup>, Trine Nielsen<sup>1</sup>, Torben Hansen<sup>1,2</sup>, Oluf Pedersen<sup>1</sup>

- <sup>1</sup> The Novo Nordisk Foundation Center for Basic Metabolic Research, Section of Metabolic Genetics, Faculty of Health and Medical Sciences University of Copenhagen, Denmark
- <sup>2</sup> Faculty of Health Sciences, University of Southern Denmark, Odense, Denmark

FIGURE S1. CORE MICROBIOTA ACROSS DIETARY PATTERNS

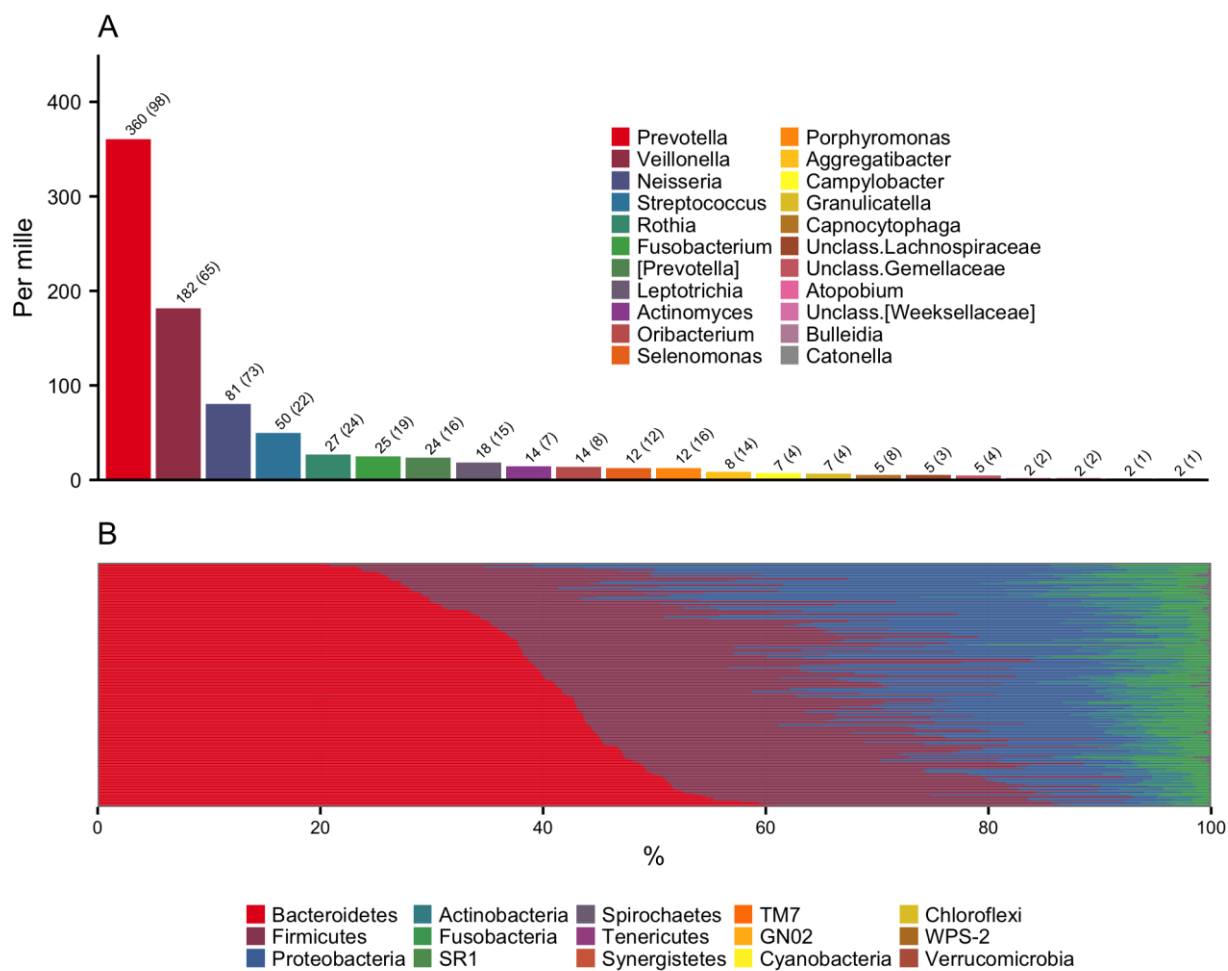

[A] Average relative abundance of 23 core genera present in >95% of individuals across dietary patterns. Mean abundance for each genus is given relative to the total number of reads per sample (‰) with standard deviation in parentheses. [B] Relative abundance of the bacterial phyla of all individual saliva samples, sorted by increasing proportion of *Bacteroidetes*.

FIGURE S2. CO-OCCURRENCE AND CO-EXCLUSION BETWEEN CORE GENERA

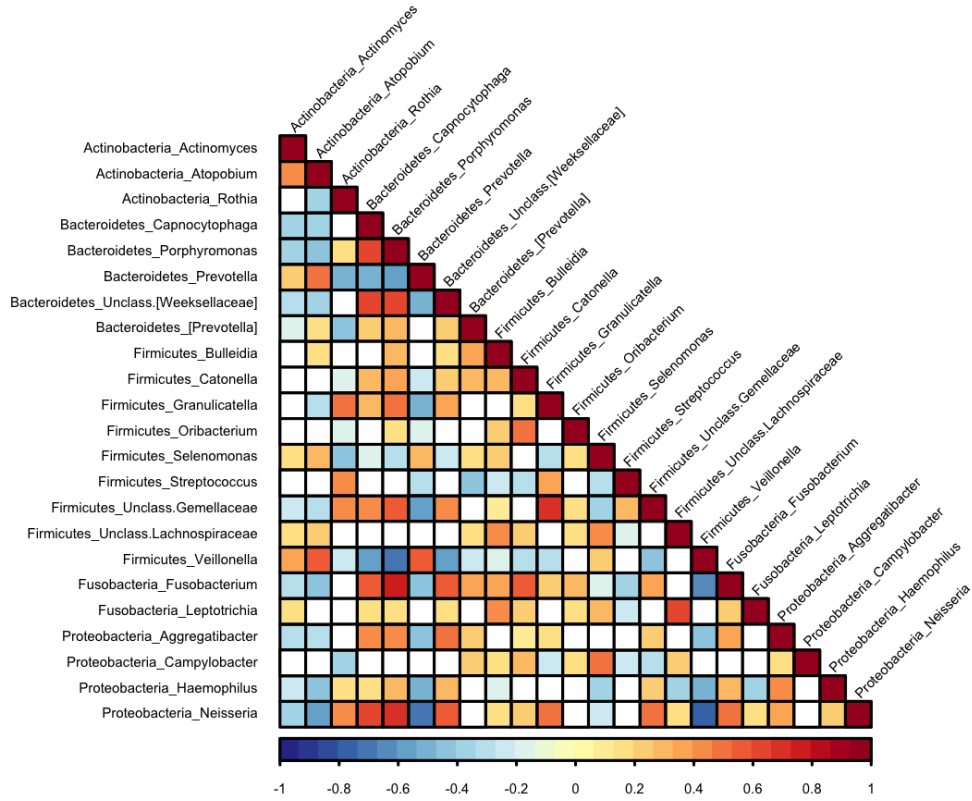

Correlogram indicating spearman correlations between the 23 core genera present in >95% of individuals across dietary patterns. For each genus the pertinent phylum is given followed by the lowest annotated taxonomic name in Greengenes (i.e. Proteobacteria\_Neisseria). Genera are ordered by phylum and only correlations with false discovery rate  $\leq 10\%$  are shown.

FIGURE S3. ALPHA DIVERSITY IN VEGANS AND OMNIVORES

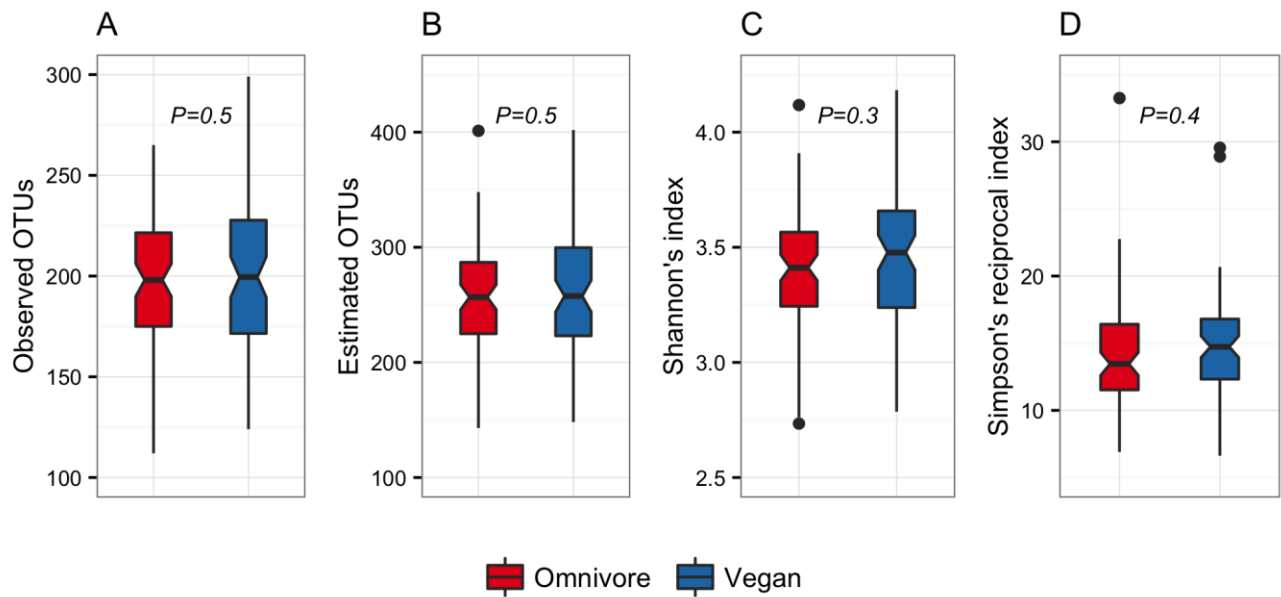

Observed richness [A], Chao1 estimated richness [B], Shannon's index [C] and Simpson's reciprocal index [D] in vegans and omnivores. Boxes represent interquartile range (IQR), with the inside horizontal line representing the median. Whiskers represent values within 1.5xIQR of the first and third quartiles. Circles represent outliers beyond the whiskers. The notch represents 50% of IQR. Difference in geometric mean was assessed by Student's t-test.

FIGURE S4. BETA-DIVERSITY IN VEGANS AND OMNIVORES

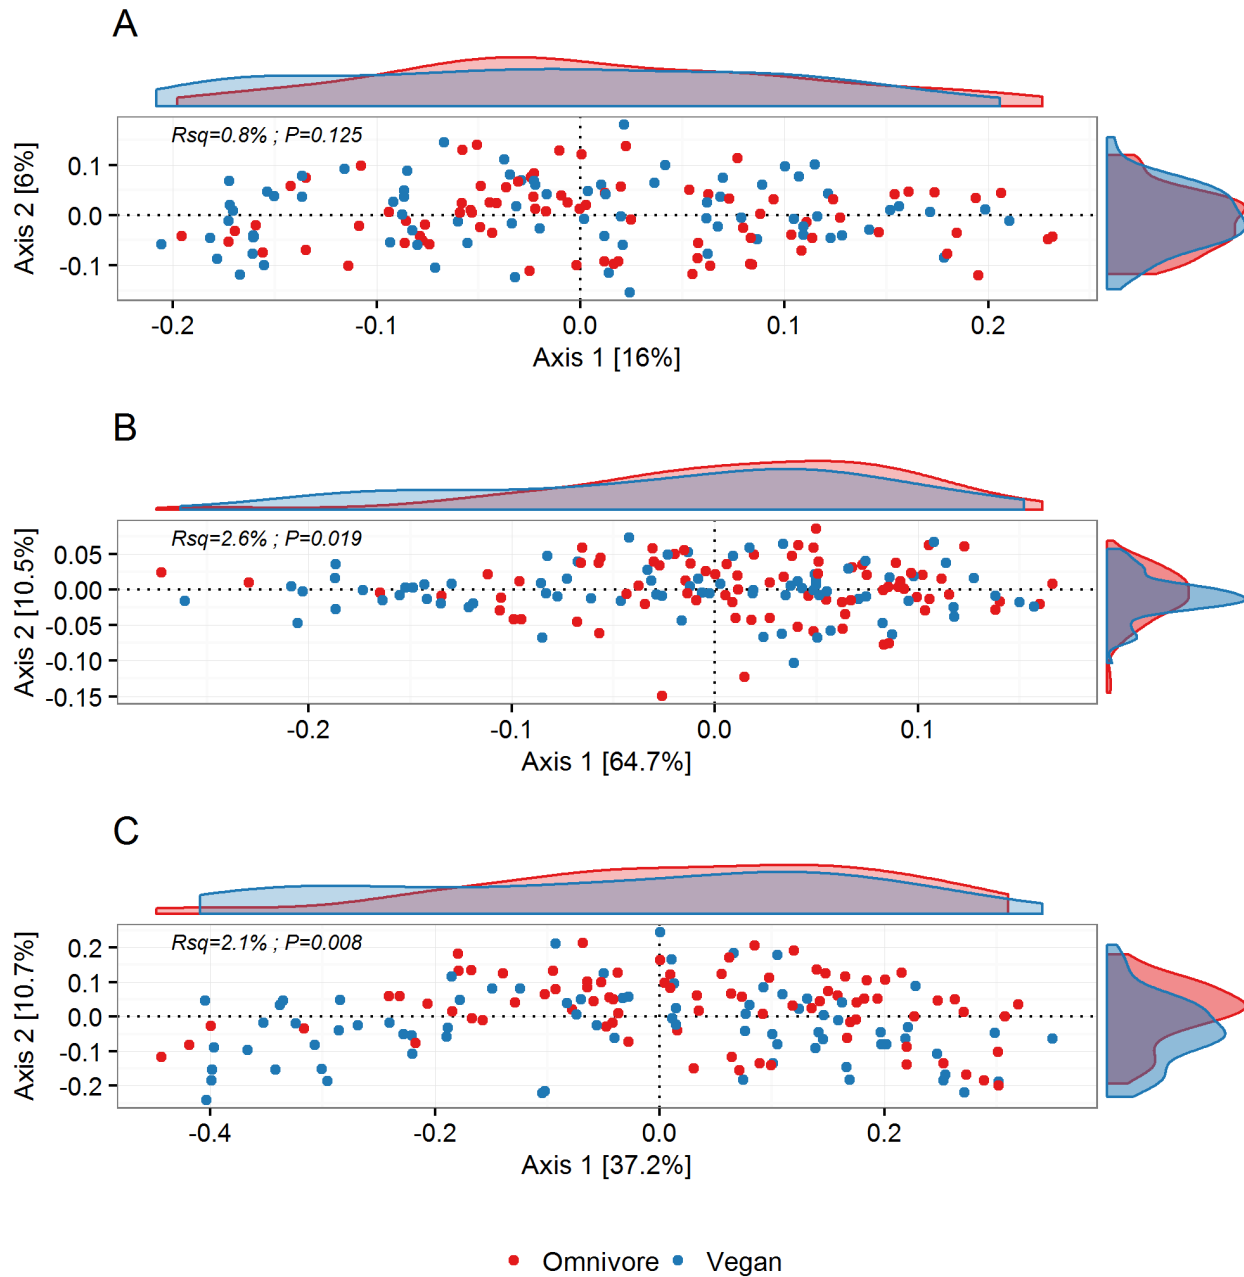

Principal coordinate ordination of microbial community structure using unweighted UniFrac [A], weighted UniFrac [B], and Bray-Curtis [C] distances. Samples are depicted in two dimensions along principal coordinate axes 1 and 2 with density along each axis. The variation in community structure explained by diet pattern ( $R^2$  contrasting vegan vs. omnivore) was assessed by permutational analysis of variance.

FIGURE S5. DIFFERENTIAL ABUNDANCE OF HIGHER ORDER TAXA

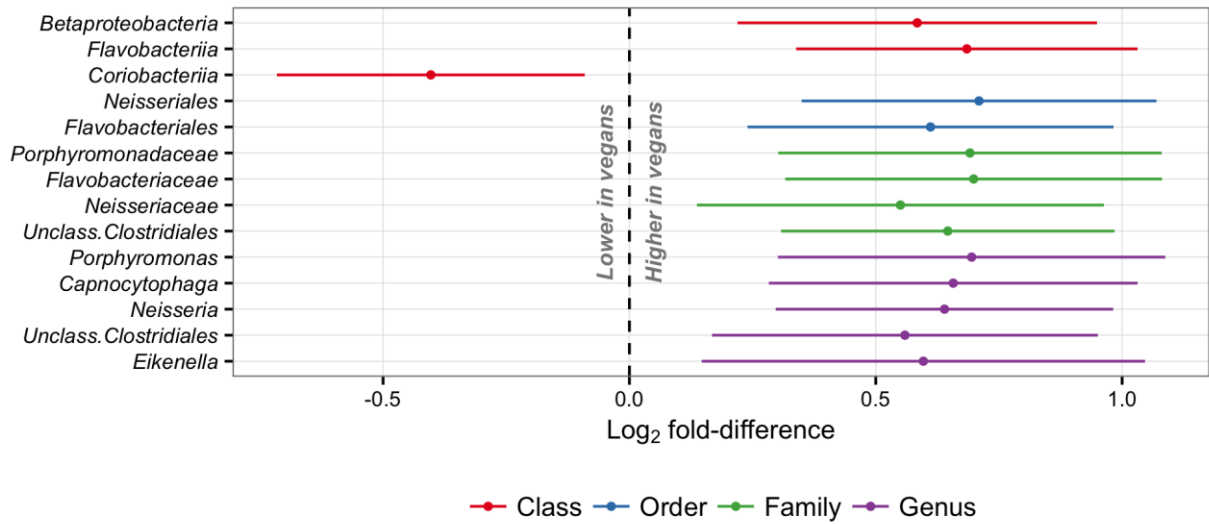

Forest plot of differential abundance of higher order taxa in vegans relative to omnivores represented by log<sub>2</sub> fold-difference and corresponding 95% confidence intervals from a negative binomial Wald test (DESeq2). Only taxa differentially abundant at an FDR≤10% are depicted.

FIGURE S6. COINERTIA OF SALIVARY MICROBIOTA AND DIET

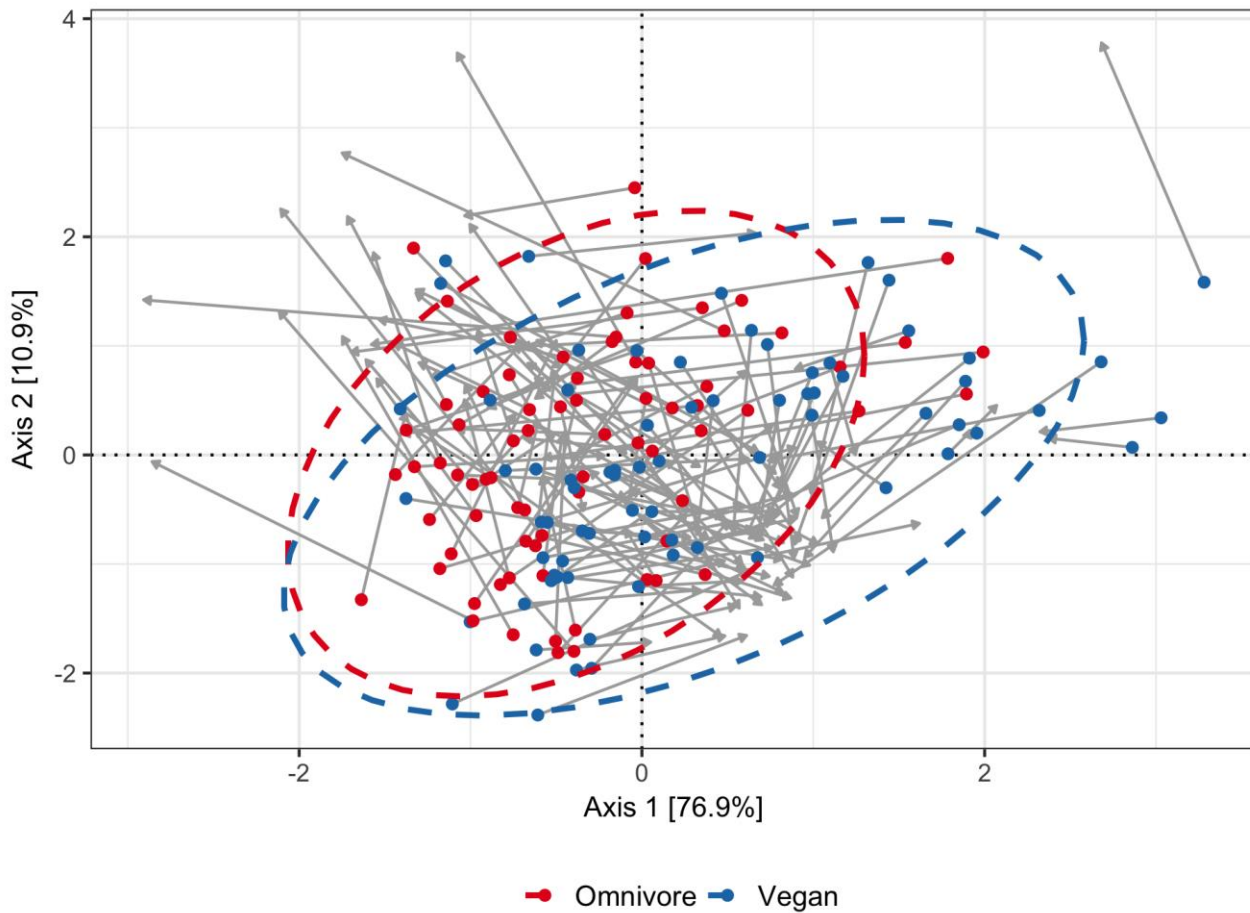

Coinertia plot depicting samples in two dimensions along coinertia axes 1 and 2. The variation captured by each axis is given in percent. Dots represent position of samples based on principal component analysis of OTU abundance and arrowheads indicate the position based on principal component analysis of the dietary data. Ellipses represent the microbiota of vegans and omnivores assuming a multivariate normal distribution with 95% confidence.

FIGURE S7. LOADING PLOTS FOR THE DIET PRINCIPAL COMPONENTS ASSOCIATED WITH ALPHA AND BETA DIVERSITY

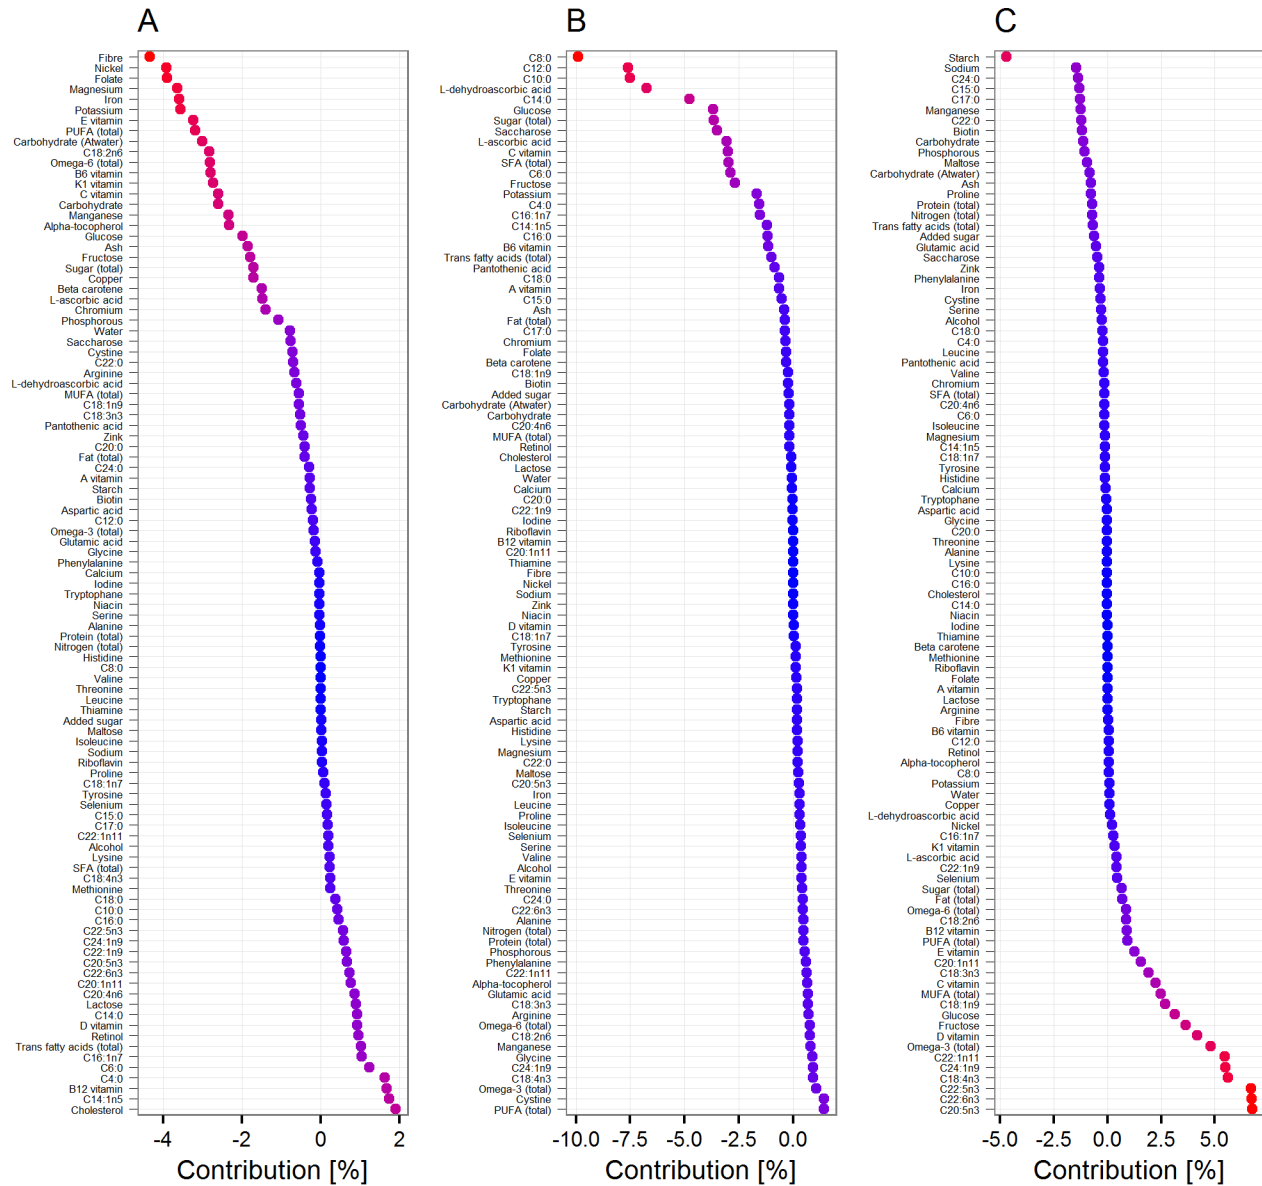

Contribution of individual nutrients to the second [A], third [B] and fifth [C] diet principal components. The relative contribution of each nutrient is calculated as the ratio of the loading of the nutrient to the sum of all the loadings for a given PC. Negative percentages indicate a negative loading of the nutrient on the PC. SFA, saturated fatty acid. MUFA, mono-unsaturated fatty acids. PUFA, poly-unsaturated fatty acids.



FIGURE S8. FUNCTIONAL ALPHA AND BETA DIVERSITY

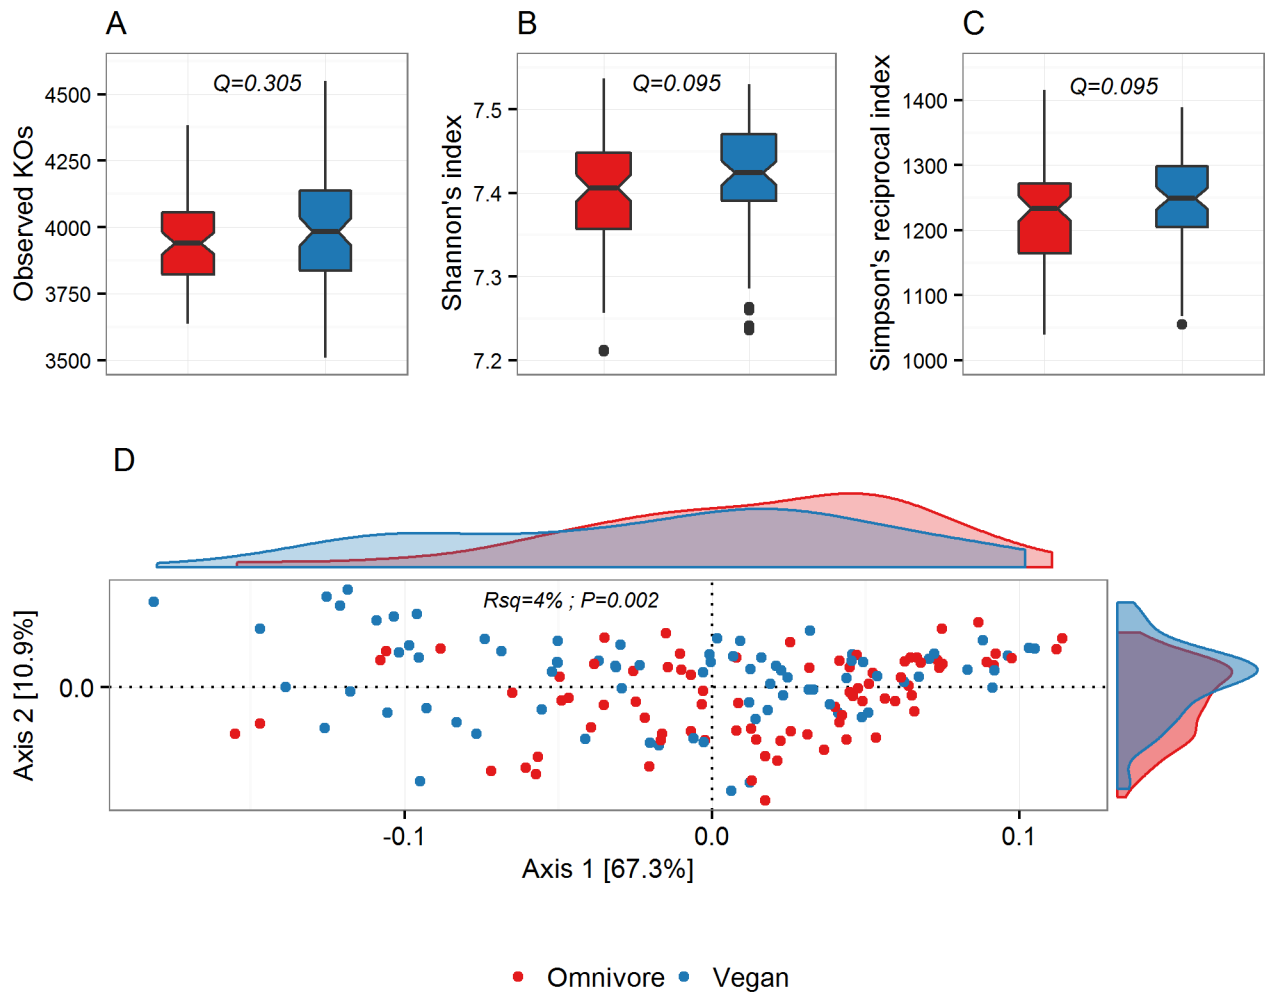

Functional alpha-diversity in vegans and omnivores as represented by observed richness [A], Shannon's index [B] and Simpson's reciprocal index [C] based on KEGG orthologs. Difference in geometric mean was assessed by t-tests. Boxplots configured similar to figure 1. [D] Principal coordinate ordination of Kyoto Encyclopaedia of Genes and Genomes orthologs (KO) using Bray-Curtis distances. Samples are depicted in two dimensions along principal coordinate axes one and two with density along each axis. The variation in functional potential explained by diet pattern ( $R^2$  contrasting vegan vs. omnivore) was assessed by permutational analysis of variance.

TABLE S1. DAILY MACRO- AND MICRONUTRIENT INTAKE IN VEGANS AND OMNIVORES

|                           | Omnivores |      | Vegans |      | P       | Q       |
|---------------------------|-----------|------|--------|------|---------|---------|
|                           | Median    | IQR  | Median | IQR  |         |         |
| Added sugar (g)           | 10.4      | 9.8  | 8.4    | 9.7  | 1.4E-01 | 1.5E-01 |
| Total carbohydrate (g)    | 113.8     | 17.5 | 135.8  | 22.1 | 7.3E-12 | 1.5E-11 |
| Energy - carbohydrate (%) | 48.9      | 8.1  | 58.5   | 11.6 | 4.0E-13 | 9.6E-13 |
| Fibre (g)                 | 12.7      | 4.0  | 19.0   | 5.3  | 7.2E-17 | 2.3E-16 |
| Fructose (g)              | 4.7       | 3.2  | 5.7    | 4.7  | 8.6E-03 | 1.0E-02 |
| Glucose (g)               | 4.5       | 2.7  | 5.4    | 4.8  | 2.7E-03 | 3.4E-03 |
| Lactose (g)               | 4.6       | 3.9  | 0.02   | 0.07 | 4.7E-26 | 7.1E-25 |
| Maltose (g)               | 0.7       | 0.8  | 0.4    | 0.7  | 2.4E-03 | 3.0E-03 |
| Saccharose (g)            | 11.8      | 7.8  | 11.3   | 8.7  | 9.3E-01 | 9.3E-01 |
| Starch (g)                | 37.7      | 17.9 | 48.2   | 23.8 | 6.8E-03 | 8.1E-03 |
| Total sugar (g)           | 36.1      | 9.4  | 37.3   | 17.1 | 5.3E-01 | 5.5E-01 |
| C4:0 (g)                  | 0.3       | 0.3  | 0      | 0    | 3.5E-29 | 2.4E-27 |
| C6:0 (g)                  | 0.3       | 0.2  | 0      | 0    | 1.4E-26 | 3.0E-25 |
| C8:0 (g)                  | 0.1       | 0.1  | 0      | 0.04 | 2.1E-15 | 5.6E-15 |
| C10:0 (g)                 | 0.3       | 0.2  | 0      | 0.04 | 5.0E-20 | 2.4E-19 |
| C12:0 (g)                 | 0.4       | 0.3  | 0.08   | 0.4  | 6.2E-08 | 1.0E-07 |
| C14:0 (g)                 | 1.2       | 0.7  | 0.07   | 0.2  | 1.2E-22 | 7.7E-22 |
| C14:1n5 (g)               | 0.1       | 0.07 | 0      | 0    | 6.8E-29 | 2.4E-27 |
| C15:0 (g)                 | 0         | 0    | 0      | 0    | 4.3E-03 | 5.3E-03 |
| C16:0 (g)                 | 6.8       | 1.6  | 2.7    | 1.3  | 3.9E-24 | 3.7E-23 |
| C16:1n7 (g)               | 0.6       | 0.2  | 0.1    | 0.1  | 1.2E-24 | 1.3E-23 |
| C17:0 (g)                 | 0         | 0    | 0      | 0    | 8.7E-04 | 1.1E-03 |
| C18:0 (g)                 | 2.8       | 0.9  | 1.2    | 0.7  | 4.5E-23 | 3.2E-22 |
| C18:1n7 (g)               | 0.03      | 0.05 | 0.02   | 0.03 | 1.4E-01 | 1.5E-01 |
| C18:1n9 (g)               | 10.9      | 4.2  | 9.2    | 5.5  | 1.6E-03 | 2.0E-03 |
| C18:2n6 (g)               | 4.0       | 1.7  | 5.8    | 3.8  | 1.5E-07 | 2.4E-07 |
| C18:3n3 (g)               | 0.7       | 0.5  | 0.8    | 0.7  | 8.5E-01 | 8.6E-01 |
| C18:4n3 (g)               | 0         | 0.02 | 0      | 0    | 2.2E-11 | 4.2E-11 |
| C20:0 (g)                 | 0.07      | 0.06 | 0.05   | 0.07 | 1.1E-02 | 1.3E-02 |
| C20:1n11 (g)              | 0.3       | 0.1  | 0.06   | 0.06 | 2.6E-23 | 2.0E-22 |
| C20:4n6 (g)               | 0.02      | 0.03 | 0      | 0    | 2.9E-20 | 1.6E-19 |
| C20:5n3 (g)               | 0.04      | 0.08 | 0      | 0    | 1.2E-15 | 3.3E-15 |
| C22:0 (g)                 | 0.03      | 0.03 | 0.02   | 0.09 | 2.3E-01 | 2.5E-01 |
| C22:1n11 (g)              | 0         | 0.05 | 0      | 0    | 1.6E-09 | 2.7E-09 |
| C22:1n9 (g)               | 0.01      | 0.04 | 0      | 0    | 4.8E-10 | 8.6E-10 |
| C22:5n3 (g)               | 0.01      | 0.02 | 0      | 0    | 3.2E-12 | 7.0E-12 |
| C22:6n3 (g)               | 0.1       | 0.2  | 0      | 0    | 2.3E-23 | 1.9E-22 |

TABLE S1 (CONTINUED)

|                           | Omnivores |        | Vegans  |        | P       | Q       |
|---------------------------|-----------|--------|---------|--------|---------|---------|
|                           | Median    | IQR    | Median  | IQR    |         |         |
| C22:6n3 (g)               | 0.1       | 0.2    | 0       | 0      | 2.3E-23 | 1.9E-22 |
| C24:0 (g)                 | 0.02      | 0.04   | 0.01    | 0.03   | 4.5E-01 | 4.7E-01 |
| C24:1n9 (g)               | 0.01      | 0.02   | 0       | 0      | 1.7E-12 | 3.9E-12 |
| Cholesterol (mg)          | 117.6     | 72.6   | 0.1     | 0.4    | 4.6E-26 | 7.1E-25 |
| Energy - fat (%)          | 31.6      | 7.8    | 27.5    | 11.0   | 2.0E-05 | 2.9E-05 |
| Total fat (g)             | 36.6      | 8.9    | 31.7    | 12.8   | 1.6E-05 | 2.3E-05 |
| MUFA (g)                  | 12.1      | 4.3    | 10.1    | 6.2    | 1.3E-03 | 1.7E-03 |
| PUFA (g)                  | 5.5       | 2.5    | 9.3     | 4.5    | 5.7E-13 | 1.3E-12 |
| SFA (g)                   | 12.9      | 3.3    | 6.0     | 4.0    | 7.6E-21 | 4.3E-20 |
| Total omega-3 (g)         | 0.9       | 0.7    | 0.8     | 0.7    | 9.9E-03 | 1.2E-02 |
| Total omega-6 (g)         | 4.1       | 1.7    | 5.8     | 3.8    | 1.9E-07 | 2.9E-07 |
| Total transfattyacids (g) | 0.5       | 0.3    | 0       | 0      | 8.8E-26 | 1.2E-24 |
| Ash (g)                   | 8.2       | 1.6    | 8.5     | 2.3    | 3.3E-01 | 3.5E-01 |
| Calcium (mg)              | 457.4     | 178.3  | 332.3   | 96.9   | 5.7E-10 | 1.0E-09 |
| Chromium (µg)             | 12.7      | 5.3    | 14.8    | 5.8    | 1.3E-03 | 1.7E-03 |
| Copper (mg)               | 1.7       | 1.0    | 2.3     | 1.2    | 7.0E-04 | 9.4E-04 |
| Iodine (µg)               | 60.9      | 25.5   | 28.5    | 16.7   | 1.8E-15 | 4.8E-15 |
| Iron (mg)                 | 5.2       | 1.0    | 6.8     | 2.0    | 7.3E-10 | 1.3E-09 |
| Magnesium (mg)            | 179.3     | 50.4   | 229.8   | 66.3   | 2.1E-10 | 3.8E-10 |
| Manganese (mg)            | 2.6       | 1.3    | 3.2     | 1.7    | 4.7E-04 | 6.4E-04 |
| Nickel (µg)               | 65.2      | 42.8   | 119.0   | 51.0   | 1.7E-11 | 3.3E-11 |
| Phosphorous (mg)          | 656.3     | 165.8  | 586.8   | 178.8  | 9.9E-04 | 1.3E-03 |
| Potassium (mg)            | 1399.3    | 425.8  | 1670.3  | 454.9  | 1.6E-05 | 2.3E-05 |
| Selenium (µg)             | 20.0      | 8.5    | 11.5    | 3.8    | 8.2E-17 | 2.6E-16 |
| Sodium (mg)               | 1103.8    | 408.7  | 764.6   | 388.6  | 1.6E-07 | 2.4E-07 |
| Zink (mg)                 | 5.3       | 1.1    | 3.9     | 1.5    | 2.1E-12 | 4.6E-12 |
| Alcohol (g)               | 2.6       | 6.1    | 0.8     | 3.4    | 7.0E-02 | 7.8E-02 |
| Energy - alcohol (%)      | 1.7       | 3.6    | 0.6     | 2.1    | 7.5E-02 | 8.3E-02 |
| Energy (kJ)               | 9770.0    | 3570.0 | 10004.7 | 4325.4 | 5.2E-01 | 5.5E-01 |
| Water (g)                 | 1039.9    | 495.1  | 1090.3  | 544.7  | 5.4E-01 | 5.6E-01 |
| Alanine (mg)              | 1279.9    | 388.8  | 768.0   | 261.2  | 1.1E-16 | 3.2E-16 |
| Arginine (mg)             | 1529.1    | 496.2  | 1172.0  | 576.2  | 3.3E-06 | 5.1E-06 |
| Aspartic acid (mg)        | 2438.8    | 619.7  | 1757.2  | 702.7  | 4.8E-12 | 1.0E-11 |
| Cystine (mg)              | 266.3     | 99.3   | 221.2   | 119.2  | 6.3E-04 | 8.5E-04 |
| Glutamic acid (mg)        | 4937.0    | 1435.6 | 3424.4  | 1429.2 | 3.0E-11 | 5.7E-11 |
| Glycine (mg)              | 1077.3    | 297.8  | 725.3   | 276.2  | 7.5E-13 | 1.7E-12 |
| Histidine (mg)            | 709.2     | 261.0  | 430.7   | 150.5  | 2.5E-17 | 8.2E-17 |

TABLE S1 (CONTINUED)

|                             | Omnivores |        | Vegans |        | P       | Q       |
|-----------------------------|-----------|--------|--------|--------|---------|---------|
|                             | Median    | IQR    | Median | IQR    |         |         |
| Isoleucine (mg)             | 1276.6    | 463.4  | 706.7  | 265.5  | 4.2E-20 | 2.1E-19 |
| Leucine (mg)                | 2099.5    | 743.3  | 1183.3 | 452.3  | 1.9E-19 | 8.8E-19 |
| Lysine (mg)                 | 1800.7    | 707.1  | 748.9  | 354.7  | 1.2E-22 | 7.7E-22 |
| Methionine (mg)             | 603.0     | 225.9  | 271.5  | 113.1  | 1.5E-23 | 1.4E-22 |
| Total nitrogen (g)          | 6.2       | 1.0    | 4.6    | 1.1    | 5.7E-19 | 2.5E-18 |
| Phenylalanine (mg)          | 1230.6    | 429.8  | 827.0  | 339.8  | 4.6E-14 | 1.2E-13 |
| Proline (mg)                | 1831.4    | 655.0  | 1090.6 | 429.5  | 2.7E-18 | 1.0E-17 |
| Energy - protein (%)        | 15.7      | 2.8    | 12.1   | 2.6    | 7.7E-19 | 3.1E-18 |
| Total protein (g)           | 38.8      | 6.5    | 28.9   | 6.9    | 6.1E-19 | 2.6E-18 |
| Serine (mg)                 | 1308.0    | 515.0  | 796.5  | 315.9  | 3.3E-16 | 9.8E-16 |
| Threonine (mg)              | 999.0     | 355.6  | 578.3  | 216.4  | 6.5E-18 | 2.2E-17 |
| Tryptophan (mg)             | 333.3     | 105.7  | 207.1  | 84.7   | 6.0E-18 | 2.1E-17 |
| Tyrosine (mg)               | 931.6     | 378.5  | 426.5  | 198.3  | 1.9E-22 | 1.1E-21 |
| Valine (mg)                 | 1588.3    | 537.6  | 893.2  | 344.2  | 3.1E-18 | 1.1E-17 |
| A vitamin (RE)              | 344.0     | 271.9  | 229.8  | 207.1  | 1.0E-04 | 1.4E-04 |
| Alpha tocopherol (mg)       | 3.5       | 1.7    | 6.2    | 4.0    | 1.1E-11 | 2.2E-11 |
| B12 vitamin (µg)            | 2.2       | 1.3    | 0      | 0      | 6.8E-29 | 2.4E-27 |
| B6 vitamin (mg)             | 0.7       | 0.2    | 0.8    | 0.2    | 1.3E-02 | 1.5E-02 |
| Beta carotene (µg)          | 1813.6    | 2693.9 | 2493.4 | 2424.3 | 4.5E-03 | 5.4E-03 |
| Biotin (µg)                 | 16.3      | 6.1    | 11.1   | 5.2    | 5.6E-08 | 9.1E-08 |
| C vitamin (mg)              | 55.5      | 45.6   | 93.0   | 49.9   | 1.5E-09 | 2.5E-09 |
| D vitamin (µg)              | 1.2       | 1.7    | 0      | 0      | 4.9E-28 | 1.3E-26 |
| E vitamin (αTE)             | 4.0       | 1.8    | 6.9    | 3.9    | 5.5E-14 | 1.4E-13 |
| Folate (µg)                 | 159.4     | 53.3   | 239.0  | 92.3   | 1.2E-14 | 3.2E-14 |
| K1 vitamin (µg)             | 29.0      | 40.8   | 88.4   | 94.3   | 3.7E-10 | 6.8E-10 |
| L-ascorbic acid (mg)        | 32.0      | 33.8   | 58.8   | 40.2   | 3.5E-06 | 5.3E-06 |
| L-dehydroascorbic acid (mg) | 3.4       | 3.4    | 4.5    | 4.1    | 2.8E-02 | 3.2E-02 |
| Niacin (NE)                 | 12.4      | 2.8    | 8.4    | 2.0    | 1.3E-18 | 5.3E-18 |
| Pantothenic acid (mg)       | 2.3       | 0.6    | 1.9    | 0.7    | 1.7E-08 | 2.9E-08 |
| Retinol (µg)                | 170.4     | 150.5  | 1.1    | 13.3   | 4.2E-25 | 4.9E-24 |
| Riboflavin (µg)             | 0.7       | 0.2    | 0.5    | 0.1    | 7.5E-16 | 2.1E-15 |
| Thiamine (µg)               | 0.6       | 0.1    | 0.7    | 0.2    | 7.1E-05 | 1.0E-04 |

Median and inter quartile range (IQR) of macro/micro-nutrients intake per day per 1000 kcal in vegans and omnivores. P values (P) are from pairwise Wilcoxon rank-sum tests and adjusted *ad modum* Benjamini-Hochberg (Q). RE, retinol equivalents.

TABLE S2. CORE OPERATIONAL TAXONOMIC UNITS ACROSS DIETARY PATTERNS

| OTU     | Level   | Annotation                        | Mean RA | Min RA | Max RA |
|---------|---------|-----------------------------------|---------|--------|--------|
| 4326219 | Genus   | <i>Campylobacter</i>              | 5.6     | 0.1    | 28.1   |
| 4396235 | Species | <i>Neisseria subflava</i>         | 69.3    | 0.4    | 342.0  |
| 4477696 | Species | <i>Haemophilus parainfluenzae</i> | 94.2    | 9.0    | 260.4  |
| 4304901 | Genus   | <i>Prevotella</i>                 | 24.9    | 1.0    | 93.4   |
| 4465561 | Species | <i>Prevotella melaninogenica</i>  | 138.2   | 8.0    | 281.3  |
| 271159  | Genus   | <i>Granulicatella</i>             | 5.7     | 0.4    | 21.5   |
| 4439603 | Genus   | <i>Streptococcus</i>              | 6.2     | 0.6    | 20.7   |
| 4309301 | Genus   | <i>Streptococcus</i>              | 20.9    | 3.7    | 80.8   |
| 4446902 | Family  | <i>Gemellaceae</i>                | 4.3     | 0.3    | 25.0   |
| 3801267 | Species | <i>Veillonella parvula</i>        | 14.6    | 0.1    | 70.5   |
| 4453501 | Species | <i>Veillonella dispar</i>         | 102.3   | 1.0    | 248.6  |
| 4458959 | Genus   | <i>Veillonella</i>                | 28.6    | 2.2    | 126.4  |

Mean relative abundance (%<sub>0</sub>) of operational taxonomic units (OTU) present in all individuals. The lowest annotated taxonomic level and corresponding name is given. RA, relative abundance.

TABLE S3. DIFFERENTIALLY ABUNDANT OPERATIONAL TAXONOMIC UNITS

| OTU     | Level   | Annotation                        | Log <sub>2</sub> FD | SE   | Q     | Abundance |
|---------|---------|-----------------------------------|---------------------|------|-------|-----------|
| 4213913 | Phylum  | <i>SR1</i>                        | 1.26                | 0.33 | 0.011 | 0.3       |
| 4396235 | Species | <i>Neisseria subflava</i>         | 0.81                | 0.22 | 0.011 | 70.8      |
| 4321559 | Genus   | <i>Porphyromonas</i>              | 0.92                | 0.25 | 0.011 | 10.3      |
| 4330572 | Genus   | <i>Capnocytophaga</i>             | 0.94                | 0.26 | 0.011 | 0.8       |
| 430191  | Species | <i>Campylobacter rectus</i>       | 0.98                | 0.27 | 0.011 | 0.4       |
| 4392350 | Genus   | <i>Capnocytophaga</i>             | 0.91                | 0.25 | 0.011 | 1.2       |
| 4401186 | Genus   | <i>Eikenella</i>                  | 0.94                | 0.29 | 0.029 | 0.3       |
| 4366487 | Genus   | <i>Capnocytophaga</i>             | 0.81                | 0.25 | 0.032 | 0.6       |
| 866280  | Species | <i>Rothia mucilaginosa</i>        | 0.82                | 0.26 | 0.042 | 9.9       |
| 4425214 | Genus   | <i>Streptococcus</i>              | -0.56               | 0.18 | 0.048 | 13.8      |
| 4329788 | Order   | <i>Clostridiales</i>              | 0.68                | 0.23 | 0.052 | 0.9       |
| 4400869 | Phylum  | <i>SR1</i>                        | 0.98                | 0.33 | 0.052 | 1.3       |
| 978067  | Genus   | <i>Kingella</i>                   | 0.84                | 0.29 | 0.062 | 0.3       |
| 4337383 | Family  | <i>Neisseriaceae</i>              | 0.97                | 0.34 | 0.062 | 0.7       |
| 526804  | Genus   | <i>Streptococcus</i>              | -0.63               | 0.23 | 0.072 | 0.2       |
| 2654263 | Species | <i>Haemophilus parainfluenzae</i> | 0.76                | 0.28 | 0.072 | 0.5       |
| 4423790 | Species | <i>Porphyromonas endodontalis</i> | 0.84                | 0.31 | 0.072 | 0.8       |
| 4424239 | Genus   | <i>Streptococcus</i>              | -0.62               | 0.23 | 0.080 | 0.4       |
| 4465561 | Species | <i>Prevotella melaninogenica</i>  | -0.30               | 0.12 | 0.091 | 140.8     |
| 4432435 | Order   | <i>Clostridiales</i>              | 0.70                | 0.27 | 0.094 | 0.6       |
| 4303688 | Genus   | <i>Lautropia</i>                  | 0.75                | 0.29 | 0.100 | 0.9       |
| 4324467 | Family  | <i>Lachnospiraceae</i>            | 0.46                | 0.18 | 0.100 | 1.7       |

Operational taxonomic units (OTUs) differentially abundant in vegans and omnivores. The lowest annotated taxonomic level and corresponding name is given. For each differentially abundant taxon the mean relative abundance (‰) in omnivores is presented. Differential abundance was tested using a negative binomial Wald test. P-values were adjusted according to Benjamini and Hochberg. Only associations significant at a false discovery rate  $\leq 10\%$  (Q) are listed. OTUs are ordered by increasing Q value. Log<sub>2</sub> FD, fold difference in abundance in vegans relative to omnivores on the log<sub>2</sub> scale. SE, standard error for the log<sub>2</sub> fold difference.

TABLE S4. DIETARY PRINCIPAL COMPONENTS AND OPERATIONAL TAXONOMIC UNIT

| OTU      | Level   | Annotation                        | Log <sub>2</sub> FD | SE   | Q       | PC  |
|----------|---------|-----------------------------------|---------------------|------|---------|-----|
| 43347701 | Species | <i>Veillonella dispar</i>         | 1.89                | 0.43 | 0.00334 | PC2 |
| 43664871 | Genus   | <i>Capnocytophaga</i>             | -1.46               | 0.37 | 0.01258 | PC2 |
| 43923501 | Genus   | <i>Capnocytophaga</i>             | -1.31               | 0.36 | 0.02435 | PC2 |
| 43962351 | Species | <i>Neisseria subflava</i>         | -1.08               | 0.31 | 0.02888 | PC2 |
| 43108291 | Genus   | <i>Neisseria</i>                  | -1.56               | 0.47 | 0.04259 | PC2 |
| 43215591 | Genus   | <i>Porphyromonas</i>              | -1.13               | 0.36 | 0.06015 | PC2 |
| 8662801  | Species | <i>Rothia mucilaginosa</i>        | -1.17               | 0.38 | 0.06502 | PC2 |
| 44237901 | Species | <i>Porphyromonas endodontalis</i> | -1.33               | 0.43 | 0.06731 | PC2 |
| 42139131 | Phylum  | <i>SR1</i>                        | -1.41               | 0.47 | 0.07178 | PC2 |
| 44002601 | Genus   | <i>Leptotrichia</i>               | -1.39               | 0.46 | 0.07178 | PC2 |
| 44095451 | Genus   | <i>Porphyromonas</i>              | -1.18               | 0.39 | 0.07178 | PC2 |
| 1094131  | Genus   | <i>Actinobacillus</i>             | 1.02                | 0.35 | 0.07593 | PC2 |
| 4301911  | Species | <i>Campylobacter rectus</i>       | -1.12               | 0.39 | 0.08861 | PC2 |
| 44807772 | Genus   | <i>Prevotella</i>                 | -1.16               | 0.30 | 0.01613 | PC3 |
| 43373832 | Family  | <i>Neisseriaceae</i>              | 1.61                | 0.45 | 0.02447 | PC3 |
| 44218642 | Genus   | <i>Selenomonas</i>                | -0.99               | 0.28 | 0.02447 | PC3 |
| 44410382 | Genus   | <i>Leptotrichia</i>               | -1.44               | 0.41 | 0.02878 | PC3 |
| 229512   | Genus   | <i>Prevotella</i>                 | -1.46               | 0.44 | 0.04259 | PC3 |
| 8862642  | Species | <i>Rothia mucilaginosa</i>        | 1.07                | 0.34 | 0.06015 | PC3 |
| 43080982 | Genus   | <i>Leptotrichia</i>               | -1.17               | 0.37 | 0.06015 | PC3 |
| 42971192 | Genus   | <i>Leptotrichia</i>               | -1.13               | 0.37 | 0.06731 | PC3 |
| 44111382 | Species | <i>Rothia mucilaginosa</i>        | 1.07                | 0.35 | 0.06731 | PC3 |
| 43347704 | Species | <i>Veillonella dispar</i>         | -2.00               | 0.43 | 0.00203 | PC5 |
| 43373834 | Family  | <i>Neisseriaceae</i>              | -2.00               | 0.49 | 0.00966 | PC5 |
| 1094134  | Genus   | <i>Actinobacillus</i>             | 1.43                | 0.39 | 0.02299 | PC5 |
| 43962354 | Species | <i>Neisseria subflava</i>         | -1.12               | 0.31 | 0.02447 | PC5 |
| 43036884 | Genus   | <i>Lautropia</i>                  | -1.44               | 0.41 | 0.02878 | PC5 |
| 43215594 | Genus   | <i>Porphyromonas</i>              | -1.19               | 0.36 | 0.04259 | PC5 |
| 43077904 | Genus   | <i>Selenomonas</i>                | -0.85               | 0.28 | 0.06731 | PC5 |
| 8662804  | Species | <i>Rothia mucilaginosa</i>        | -1.11               | 0.38 | 0.08028 | PC5 |

Operational taxonomic units (OTUs) affected by dietary principal components. The lowest annotated taxonomic level and corresponding name is given. Estimates for the association between principal components two, three, and four and OTUs are given as log<sub>2</sub> fold difference (Log<sub>2</sub>FD) in abundance between quartile four relative to quartile one. Differential abundance was tested using a negative binomial Wald test. P-values were adjusted (Q) according to Benjamini and Hochberg. Only associations significant at a false discovery rate <10% are listed. OTUs are ordered by increasing Q for each principal component. SE, standard error for the log<sub>2</sub> fold difference.

TABLE S5. INFLAMMATION MARKER AND OPERATIONAL TAXONOMIC UNIT

| OTU     | Level   | Annotation                        | Log <sub>2</sub> FD | SE   | Q     | Inflammation marker |
|---------|---------|-----------------------------------|---------------------|------|-------|---------------------|
| 4366487 | Genus   | <i>Capnocytophaga</i>             | 1.35                | 0.36 | 0.046 | CRP                 |
| 430191  | Species | <i>Campylobacter rectus</i>       | 1.25                | 0.38 | 0.062 | CRP                 |
| 4473129 | Species | <i>Haemophilus parainfluenzae</i> | -1.25               | 0.37 | 0.062 | CRP                 |
| 610111  | Genus   | <i>Prevotella</i>                 | -1.42               | 0.44 | 0.069 | CRP                 |
| 886264  | Species | <i>Rothia mucilaginosa</i>        | -1.07               | 0.35 | 0.098 | CRP                 |
| 4473129 | Species | <i>Haemophilus parainfluenzae</i> | 1.28                | 0.36 | 0.084 | Leukocytes          |

Operational taxonomic units (OTUs) associated with inflammatory markers. The lowest annotated taxonomic level and corresponding name is given. Estimates for the association between high-sensitivity C-reactive protein (CRP) or total leukocyte count (Leukocyte) and OTUs are given as log<sub>2</sub> fold difference (Log<sub>2</sub>FD) in abundance between quartile four relative to quartile one. Differential abundance was tested using a negative binomial Wald test. P-values were adjusted (Q) *ad modum* Benjamini-Hochberg. Only associations significant at a false discovery rate ≤10% are listed. OTUs are ordered by increasing Q for each inflammatory marker. SE, standard error for the log<sub>2</sub> fold difference.
